# Supplementary material for: Highly conductive and flexible mesoporous graphitic films prepared by graphitizing the composites of graphene oxide and nanodiamond
Source: Royal Society of Chemistry journal article supplement (doi:10.1039/c0jm04434b), 2011-01-01
Supplement: c0jm04434b.pdf [file c0jm04434b.pdf]

## Supporting Information for

# Highly conductive and flexible mesoporous graphitic films prepared by graphitizing the composites of graphene oxide and nanodiamond

Yiqing Sun, Qiong Wu, Yuxi Xu, Hua Bai, Chun Li and Gaoquan Shi\*

Department of Chemistry, Tsinghua University, Beijing 100084, P. R. China

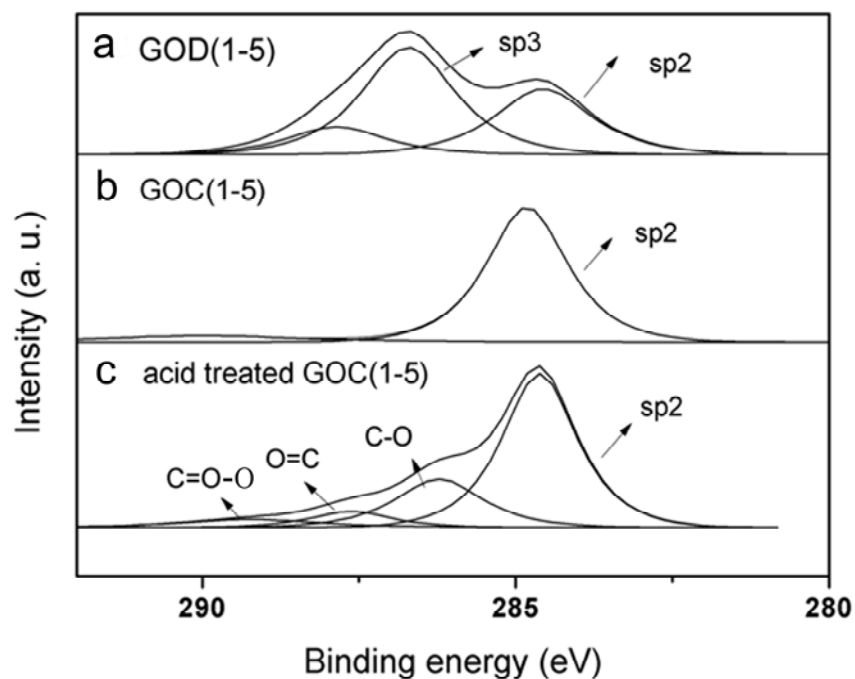

Fig. S1 C 1s XPS spectra of GOD(1-5), GOC(1-5), and acid treated GOC(1-5).

The C 1s XPS spectrum of GOD(1-5) shows two types of carbon atoms, C-C(sp<sup>3</sup>, 286.6eV) and C=C(sp<sup>2</sup>, 284.7eV) (Fig. S1a). However, the C 1s spectrum of GOC(1-5) has only one band of SP<sup>2</sup> carbon (Fig. S1b), indicating the surfaces of diamond nanoparticles were extensively graphitized by annealing at high temperature. Fig. S1c reflects that oxygen containing groups were introduced to GOC(1-5) by acid treatment.

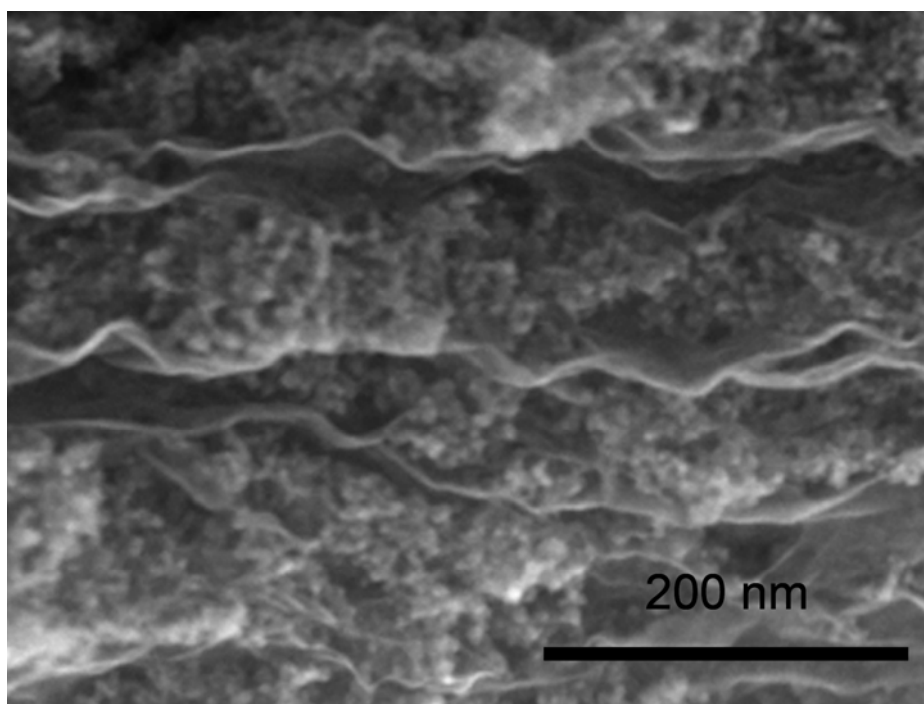

Fig. S2. Cross-section SEM image of a GOC (1-5) film after 5000 charge/discharge cycles.

**Table S1.** The atomic contents of GO, CCG, GOD, GOC and acid treated CCG and GOC

|                              | <b>C</b> | <b>N</b> | <b>O</b> | <b>S</b> |
|------------------------------|----------|----------|----------|----------|
| <b>GO</b>                    | 76.28    | 1.00     | 22.40    | 0.32     |
| <b>GOD(1-1)</b>              | 65.04    | 1.96     | 31.44    | 1.56     |
| <b>GOD(1-3)</b>              | 73.91    | 1.73     | 24.28    | 0.08     |
| <b>GOD(1-5)</b>              | 82.55    | 1.25     | 16.08    | 0.11     |
| <b>GNS</b>                   | 81.45    | 0.28     | 17.96    | 0.30     |
| <b>GOC(1-1)</b>              | 70.15    | 0.83     | 28.86    | 0.16     |
| <b>GOC(1-3)</b>              | 85.88    | 0.21     | 13.83    | 0.09     |
| <b>GOC(1-5)</b>              | 84.15    | 0.00     | 15.85    | 0.00     |
| <b>Acid treated GNS</b>      | 71.21    | 3.15     | 24.99    | 0.66     |
| <b>Acid treated GOC(1-1)</b> | 76.32    | 2.16     | 20.95    | 0.56     |
| <b>Acid treated GOC(1-3)</b> | 80.99    | 1.43     | 17.34    | 0.23     |
| <b>Acid treated GOC(1-5)</b> | 83.09    | 1.71     | 14.99    | 0.21     |
